# Supplementary material
Source: publisher site journal article supplement (https://www.dovepress.com/article/519612)
Supplement: Supplementary file 1 [file Supplementary%20Tables_1.docx]

| Supplement table 2 Response rate for physical examination among patients managed in primary healthcare settings in 2018-2022. | | | | | | |
| --- | --- | --- | --- | --- | --- | --- |
| Response rate for physical examination | Overall | 2018 | 2019 | 2020 | 2021 | 2022 |
| N=191,787 | N=18,338 | N=29,284 | N=38,858 | N=49,679 | N=55,628 |
| For physical examination (%) | 42.7 | 47.5 | 60.5 | 34.0 | 39.1 | 40.9 |
| Valid FG | 100.0 | 100.0 | 100.0 | 100.0 | 100.0 | 100.0 |
| Valid BP | 99.9 | 99.7 | 99.9 | 99.9 | 100.0 | 100.0 |
| Valid TC | 89.3 | 89.0 | 91.1 | 88.5 | 88.7 | 89.0 |
| Valid TG | 85.3 | 84.2 | 87.0 | 84.7 | 84.8 | 85.1 |
| Valid HDL | 85.0 | 84.3 | 85.1 | 84.3 | 85.1 | 85.5 |
| Valid LDL | 84.8 | 84.4 | 85.2 | 84.4 | 84.7 | 85.1 |
| Valid BMI | 99.8 | 99.0 | 99.8 | 99.8 | 99.9 | 99.9 |
| Valid WC | 99.8 | 99.1 | 99.9 | 99.8 | 100.0 | 100.0 |

| Supplement table 1 Diabetes care clinical achievement criteria according to National Guidelines | |
| --- | --- |
| Clinical measurement | Achievement Goal |
| Fasting glycemic, FG (mmol/L) | 4.4~7.0 |
| Blood pressure, BP (mmHg) | <130/80 |
| Total cholesterol, TC (mmol/L) | <4.5 |
| Triglyceride, TG (mmol/L) | <1.7 |
| High Density Lipoprotein, HDL (mmol/L) |  |
| Male | >1.0 |
| Female | >1.3 |
| Low Density Lipoprotein, LDL (mmol/L) |  |
| Without CVD | <2.6 |
| With CVD | <1.8 |
| Body Mass Index, BMI (Kg/m2) | <24 |

| Supplement table 3 Trends in crude percentage of diabetes clinical targets control. | |
| --- | --- |
| Clinical targets control | OR(95%CI)* |
| FG (<7.0 mmol/L) | 1.03(1.02,1.04) |
| BP (<130/80 mmHg) | 0.99(0.98,1.00) |
| TC (<4.5 mmol/L ) | 1.05(1.04,1.06) |
| TG (<1.7 mmol/L) | 1.02(1.01,1.04) |
| LDL (<2.6 mmol/L) | 1.04(1.03,1.06) |
| HDL (Males >1.0 mmol/L; Female >1.3 mmol/L) | 0.93(0.92,0.94) |
| BMI(<24kg/m2) | 1.02(1.01,1.03) |
| *Adjusted by age, T2DM duration, gender, marriage status, health-insurance status, T2DM family history, and hypertension comorbidity in a logistic regression with forward LR process | |
